# Supplementary material for: MxaY regulates the lanthanide-mediated methanol dehydrogenase switch in Methylomicrobium buryatense
Source: PeerJ. 2016 Sep 7;4:e2435. doi: 10.7717/peerj.2435 (PMC5018670; doi:10.7717/peerj.2435)
Supplement: Data S1 — Raw data for both growth curves and real-time qRT-PCR assays [file peerj-04-2435-s004.xlsx]

## Sheet: Growth curve data
Figures 1A/1B, Table 2
Without La growth											With La growth
		Hours											Hours
Strain	Replicate	0	11	14	17	20	23	26			Strain	Replicate	0	11	14	17	20	23	26
5GB1C	1	0.008	0.06	0.119	0.246	0.492	0.835	0.97			5GB1C	1	0.008	0.053	0.157	0.355	0.738	0.955	0.98
	2	0.008	0.057	0.125	0.276	0.548	0.905	0.97				2	0.008	0.073	0.175	0.382	0.734	0.97	0.98
	3	0.008	0.062	0.136	0.295	0.58	0.92	1				3	0.008	0.062	0.169	0.386	0.768	0.97	1.005
xoxF mutant	1	0.008	0.05	0.115	0.254	0.486	0.815	0.935			xoxF mutant	1	0.008	0.008	0.008	0.004	0.002	0.006	0.004
	2	0.008	0.044	0.101	0.227	0.444	0.794	0.945				2	0.008	0.008	0.008	0.008	0.003	0.01	0.004
	3	0.008	0.055	0.116	0.243	0.492	0.825	0.97				3	0.008	0.008	0.008	0.001	0.008	0.003	0.001
xoxFS	1	0.008	0.044	0.111	0.251	0.486	0.83	0.955			xoxFS	1	0.008	0.046	0.108	0.25	0.53	0.875	0.955
	2	0.008	0.046	0.111	0.24	0.48	0.84	0.955				2	0.008	0.037	0.114	0.252	0.522	0.875	0.965
	3	0.008	0.053	0.112	0.253	0.492	0.835	0.975				3	0.008	0.035	0.111	0.256	0.508	0.885	0.965
xoxFS; mxaY	1	0.008	0.055	0.121	0.255	0.52	0.865	0.97			xoxFS; mxaY	1	0.008	0.008	0.008	0.008	0.008	0.003	0.002
	2	0.008	0.039	0.113	0.256	0.522	0.86	0.96				2	0.008	0.008	0.008	0.008	0.008	0.003	0.002
	3	0.008	0.062	0.134	0.27	0.536	0.875	0.99				3	0.008	0.008	0.008	0.008	0.008	0.004	0.004
Figure 2C/D, Table 3
Without La growth											With La growth
		Hours											Hours
Strain	Replicate	0	11	14	17	20	23	26			Strain	Replicate	0	11	14	17	20	23	26
5GB1C	1	0.008	0.078	0.153	0.308	0.514	0.794	0.915			5GB1C	1	0.008	0.087	0.212	0.438	0.788	0.95	0.99
	2	0.008	0.071	0.16	0.35	0.636	0.905	0.975				2	0.008	0.073	0.19	0.418	0.756	0.935	0.97
	3	0.008	0.052	0.135	0.309	0.574	0.865	0.955				3	0.008	0.074	0.182	0.428	0.78	0.925	0.965
mxaY mutant	1	0.008	0.022	0.031	0.038	0.045	0.05	0.051			mxaY mutant	1	0.008	0.037	0.051	0.068	0.079	0.09	0.119
	2	0.008	0.057	0.108	0.19	0.277	0.372	0.476				2	0.008	0.031	0.046	0.06	0.075	0.096	0.138
	3	0.008	0.045	0.095	0.161	0.216	0.275	0.349				3	0.008	0.049	0.062	0.075	0.087	0.102	0.135
mxaY wt comp	1	0.008	0.078	0.166	0.343	0.622	0.885	0.955			mxaY wt comp	1	0.008	0.089	0.2	0.45	0.798	0.935	0.98
	2	0.008	0.071	0.144	0.298	0.522	0.806	0.915				2	0.008	0.063	0.167	0.394	0.712	0.935	0.995
	3	0.008	0.071	0.146	0.331	0.588	0.855	0.93				3	0.008	0.068	0.177	0.41	0.76	0.905	1.02
mxaY E147G	1	0.008	0.111	0.229	0.468	0.802	0.995	1.04			mxaY E147G	1	0.008	0.048	0.065	0.076	0.093	0.102	0.119
	2	0.008	0.11	0.219	0.444	0.746	0.975	1.05				2	0.008	0.035	0.053	0.066	0.075	0.08	0.093
	3	0.008	0.096	0.205	0.414	0.728	0.945	1.02				3	0.008	0.038	0.059	0.07	0.072	0.082	0.09

## Sheet: qRT-PCR data
All values shown are 2^-(deltaCt) numbers, in comparison to 16S
Figure 2A								Figure 2B
	mxaF	mxaB	xoxF						mxaF	mxaB	xoxF
5GB1C	0.0379436	0.000372622	0.0033771					mxaY -La	3.13755e-05	4.9576e-05	0.0656073
	0.0859714	0.00042803	0.00364466						4.14003e-05	6.31876e-05	0.138696
	0.0448111	0.000385762	0.00461325						2.63836e-05	6.01949e-05	0.116629
mxaY mutant	2.4788e-05	5.53906e-05	0.0409498					mxaY +La	2.3128e-05	2.98895e-05	0.0344345
	2.14301e-05	6.45153e-05	0.0567199						2.46168e-05	1.30102e-05	0.0356489
	1.02076e-05	6.14597e-05	0.0321286						1.97197e-05	3.40969e-05	0.047039
Figure 3A
	mxaF	mxaB	xoxF					Figure 3B	mxaF	mxaB	xoxF
5GB1C	1.4237e-05	1.0067e-05	0.0241807					mxaY E147G -La	0.0337259	0.000481559	0.00596195
	1.31007e-05	6.15419e-06	0.189465						0.106579	0.000530632	0.0061722
	2.01341e-05	6.876e-06	0.0188407						0.075363	0.000342882	0.00442533
MxaY E147G	0.0412346	0.000245839	0.00369554					mxaY E147G +La	0.0683934	0.000280444	0.00445611
	0.0243489	0.000107752	0.00143972						0.040386	0.000244141	0.00374713
	0.0238478	0.000202471	0.00293994						0.029977	0.000223103	0.00221266
Figure S1	mxaF	mxaB	xoxF
mxaY comp -La	0.0629347	0.000234195	0.00445611
	0.0859714	0.000377823	0.00909948
	0.0836205	0.000286337	0.0043644
mxaY comp +La	1.28311e-05	4.29176e-06	0.100134
	1.6354e-05	7.21785e-06	0.0987552
	1.01371e-05	4.92993e-06	0.167241
Figure S2	mxaF	mxaB	xoxF
120064 -La	0.060371	0.000270891	0.00548611
	0.042837	0.000167332	0.0043493
	0.0371627	0.000296434	0.00592077
120064 +La	9.57033e-06	2.82562e-06	0.0408647
	1.10163e-05	3.46191e-06	0.0674518
	1.74067e-05	4.14556e-06	0.0748424
