# Supplementary material for: MxaY regulates the lanthanide-mediated methanol dehydrogenase switch in Methylomicrobium buryatense
Source: PubMed Central journal article supplement (PMC5018670; doi:10.7717/peerj.2435), 2016-09-07

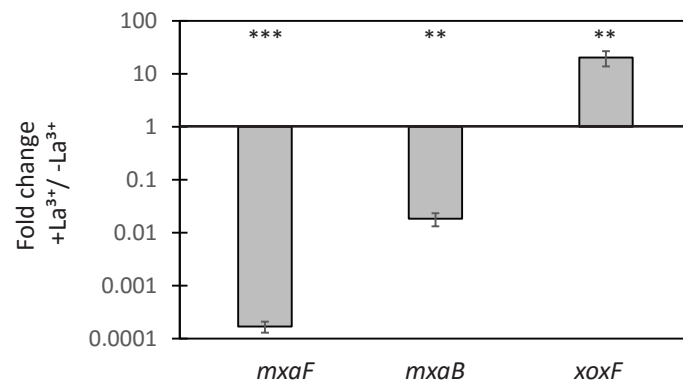

Supplement: peerj-04-2435-s001.pdf [file peerj-04-2435-s001.pdf]
